# Supplementary material
Source: publisher site journal article supplement (https://www.dovepress.com/article/444223)
Supplement: Supplementary file 1 [file get_supplementary_file.php]

# Psychometric evaluation and linking of the PHQ-9, QIDS-C, and VQIDS-C in a real-world population with major depressive disorder

## Supplementary Material

**Supplemental Table 1. ICD-9 and ICD-10 codes used to define psychiatric disorders of interest**

| Major Depressive Disorders | **ICD-10-CM:**  F32, F32.0, F32.1, F32.2, F32.4, F32.5, F32.8, F32.81, F32.89, F32.9, F33, F33.0, F33.1, F33.2, , F33.4, F33.41, F33.42, F33.8, F33.9  **ICD-9-CM:**  296.2, 296.21, 296.22, 296.23, 296.24, 296.25, 296.26, 296.3, 296.31, 296.32, 296.33,296.35, 296.36 |
| --- | --- |
| Schizophrenia | **ICD-10-CM:**  F20, F20.0, F20.1, F20.2, F20.3, F20.5, F20.8, F20.81, F20.89, F20.9,  **ICD-9-CM:**  295, 295.0, 295.00, 295.01, 295.02, 295.03, 295.04, 295.05, 295.1, 295.10, 295.11, 295.12, 295.13, 295.14, 295.15, 295.2, 295.20, 295.21, 295.22, 295.23, 295.24, 295.25, 295.3, 295.30, 295.31, 295.32, 295.33, 295.34, 295.35, 295.4, 295.40, 295.41, 295.42, 295.43, 295.44, 295.45, 295.5, 295.50, 295.51, 295.52, 295.53, 295.54, 295.55, 295.6, 295.60, 295.61, 295.62, 295.63, 295.64, 295.65, 295.8, 295.80, 295.81, 295.82, 295.83, 295.84, 295.85, 295.9, 295.90, 295.91, 295.92, 295.93, 295.94, 295.95 |
| Schizoaffective disorder | **ICD-10-CM:**  F25.0, F25.1, F25.8, F25.9  **ICD-9-CM:**  295.70, 295.71, 295.72, 295.73, 295.74, 295.75 |
| Bipolar disorder | **ICD-10-CM:**  F31.0, F31.1, F31.10, F31.11, F31.12, F31.13, F31.2, F31.3, F31.30, F31.31, F31.32, F31.4, F31.5,F31.5, F31.6, F31.60, F31.61, F31.62, F31.63, F31.64, F31.7, F31.70, F31.71, F31.72, F31.73, F31.74,F31.75, F31.76, F31.77, F31.78, F31.8, F31.81, F31.89, F31.9  **ICD-9-CM:**  296.00, 296.01, 296.02, 296.03, 296.04, 296.05, 296.06, 296.40, 296.41, 296.42, 296.43, 296.44, 296.45, 296.46, 296.50, 296.51, 296.52, 296.53, 296.54, 296.55, 296.56, 296.6, 296.61, 296.62, 296.63, 296.64, 296.65, 296.66, 296.7, 296.8, 296.89 |

**Abbreviations:** ICD-9-CM, International Classification of Diseases, Ninth Revision, Clinical Modification; ICD-10-CM, International Classification of Diseases, Tenth Revision, Clinical Modification.

**Supplemental Table 2. Demographic characteristics and depressive symptomology comparisons between the final cohort and those excluded**

| **Demographic characteristic** | **Study Cohort**  **(n = 2156)** | **Individuals removed**  **(n = 184)** | **Test Statistic**  **(*p*-value)a** |
| --- | --- | --- | --- |
| **Age, mean ± SD** | 36.4 (13.0) | 34.5 (12.6) | 2.16e+05 (<0.05) |
| **Age, n (%)** |  |  |  |
| 18–34 | 1120 (52.0) | 113 (61.4) | 6.48e+00 (0.09) |
| 35–49 | 627 (29.1) | 44 (23.9) |  |
| 50–64 | 365 (16.9) | 23 (12.5) |  |
| ≥65 | 44 (2.0) | 4 (2.2) |  |
| **Sex** |  |  | 1.30e+01 (<0.05) |
| Female | 1288 (59.7) | 117 (63.6) |  |
| Male | 868 (40.3) | 66 (35.9) |  |
| Unknown | 0 (0.00) | 1 (0.5) |  |
| **Race** |  |  | 2.48e+01 (<0.05) |
| White | 1337 (62.0) | 110 (59.8) |  |
| Black or African American | 688 (31.9) | 65 (35.3) |  |
| Unknown | 81 (3.8) | 3 (1.6) |  |
| Otherb | 47 (2.2) | 3 (1.6) |  |
| Multiracial | 3 (0.1) | 3 (1.6) |  |
| **Ethnicity** |  |  | 4.04e+02 (<0.05) |
| Not Hispanic or Latino | 1302 (60.4) | 42 (22.8) |  |
| Hispanic or Latino | 641 (29.7) | 25 (13.6) |  |
| Unknown | 213 (9.9) | 117 (63.6) |  |
| **Measurements** |  |  |  |
| **PHQ-9 [mean ± SD]** | 12.92 (6.6) | 16.0 (7.8) | 1.49e+05 (<0.05) |
| None (0–4) | 251 (11.6) | 21 (11.4) | 6.42e+01 (<0.05) |
| Mild (5–9) | 513 (23.8) | 24 (13.0) |  |
| Moderate (10–14) | 472 (21.9) | 32 (17.4) |  |
| Moderately severe (15–20) | 509 (23.6) | 27 (14.7) |  |
| Severe (20–27) | 411 (19.1) | 80 (43.5) |  |
| **QIDS-C [mean ± SD]** | 12.02 (4.9) | 12.1 (4.4) | 1.98e+05 (0.99) |
| None (0–5) | 234 (10.9) | 12 (6.5) | 7.41e+00 (0.12) |
| Mild (6–10) | 585 (27.19) | 55 (29.9) |  |
| Moderate (11–15) | 846 (39.2) | 84 (45.7) |  |
| Severe (16–20) | 409 (19.0) | 29 (15.8) |  |
| Very Severe (21–27) | 82 (3.8) | 4 (2.2) |  |
| **VQIDS-C [mean ± SD]** | 6.18 (3.2) | 6.18 (2.9) | 1.99e+05 (0.94) |
| None (0–2) | 171 (7.9) | 11 (6.0) | 4.57e+00 (0.33) |
| Mild (3–5) | 758 (35.2) | 71 (38.6) |  |
| Moderate (6–9) | 677 (31.4) | 63 (34.2) |  |
| Severe (9–12) | 443 (20.5) | 28 (15.2) |  |
| Very Severe (13–15) | 107 (5.0) | 11 (6.0) |  |

**Notes:** aContinuous variables were compared using Mann-Whitney-U and categorical variables using Chi-square analysis a significance threshold of <0.05 was applied; bOther category includes Asian, Native Hawaiian or Other Pacific Islander, American Indian or Alaska Native, Vietnamese, Chinese, Filipino and Korean.

**Abbreviations:** PHQ-9, Patient Health Questionnaire-9; QIDS-C, clinician rated Quick Inventory of Depressive Symptomatology; SD, standard deviation; VQIDS-C, very brief 5-item Quick Inventory of Depressive Symptoms.

**Supplemental Table 3. Comorbidity at time of first MDD diagnosis comparisons between the final cohort and those excluded**

| **Comorbidity** | **Study Cohort**  **(n = 2156)** | **Removed from cohort**  **(n = 184)** | **Test Statistic**  **(p-value)** |
| --- | --- | --- | --- |
| **Any of the reported comorbidities, n (%)** |  |  | 1.96e-01 (0.66) |
| With | 1647 (76.4) | 141 (76.6) |  |
| Without | 509 (23.6) | 43 (23.3) |  |
| **Adjustment disorders, n (%)** |  |  | 3.87e-01 (0.53) |
| Without | 2087 (96.8) | 176 (95.7) |  |
| With | 69 (3.2) | 8 (4.4) |  |
| **Psychiatric comorbidities, n (%)** |  |  | 4.75e-02 (0.83) |
| Without | 502 (23.3) | 41 (22.3) |  |
| With | 1654 (76.7) | 143 (77.7) |  |
| **Substance-related disorders, n (%)** |  |  | 6.90e-03 (0.93) |
| Without | 1302 (60.4) | 110 (59.8) |  |
| With | 854 (39.6) | 74 (40.2) |  |
| **Phobic anxiety disorders, n (%)** |  |  | 0.00e+00 (1.00) |
| Without | 2133 (98.9) | 182 (98.9) |  |
| With | 23 (1.1) | 2 (1.1) |  |
| **Behavioral syndromes associated with physiological disturbances and physical factors, n (%)** |  |  | 0.00e+00 (1.00) |
| Without | 2142 (99.4) | 183 (99.5) |  |
| With | 14 (0.7) | 1 (0.5) |  |
| **Conduct disorders, n (%)** |  |  | 6.93e+00 (<0.05) |
| Without | 2104 (97.6) | 173 (94.0) |  |
| With | 52 (2.4) | 11 (6.0) |  |
| **Impulse disorders, n (%)** |  |  | 6.64e-02 (0.80) |
| Without | 2147 (99.6) | 184 (100.0) |  |
| With | 9 (0.4) | 0 (0.0) |  |
| **Pervasive and specific developmental disorders, n (%)** |  |  | 0.00e+00 (1.00) |
| Without | 2128 (98.7) | 182 (98.9) |  |
| With | 28 (1.3) | 2 (1.1) |  |
| **Personality disorders, n (%)** |  |  | 0.00e+00 (1.00) |
| Without | 2063 (95.7) | 176 (95.7) |  |
| With | 93 (4.3) | 8 (4.4) |  |
| **Attention-deficit hyperactivity disorders, n (%)** |  |  | 0.00e+00 (1.00) |
| Without | 2027 (94.0) | 173 (94.0) |  |
| With | 129 (6.0) | 11 (6.0) |  |
| **Post-traumatic stress disorder, n (%)** |  |  | 7.06e-01 (0.40) |
| Without | 1815 (84.2) | 150 (81.5) |  |
| With | 341 (15.8) | 34 (18.5) |  |
| **Intellectual disabilities, n (%)** |  |  | 1.92e+00 (0.17) |
| Without | 2130 (98.8) | 179 (97.3) |  |
| With | 26 (1.2) | 5 (2.7) |  |
| **Dysthymic disorder, n (%)** |  |  | 0.00e+00 (1.00) |
| Without | 2145 (99.5) | 183 (99.5) |  |
| With | 11 (0.5) | 1 (0.5) |  |
| **Panic disorder, n (%)** |  |  | 7.08e-01 (0.40) |
| Without | 2077 (96.3) | 180 (97.8) |  |
| With | 79 (3.7) | 4 (2.2) |  |
| **Generalized anxiety disorder, n (%)** |  |  | 1.48e+00 (0.22) |
| Without | 1964 (91.1) | 173 (94.0) |  |
| With | 192 (8.9) | 11 (6.0) |  |
| **Obsessive-compulsive disorder, n (%)** |  |  | 4.44e-02 (0.83) |
| Without | 2131 (98.8) | 181 (98.4) |  |
| With | 25 (1.2) | 3 (1.6) |  |
| **Disruptive mood dysregulation disorder, n (%)** |  |  | 0.00e+00 (1.00) |
| Without | 2143 (99.4) | 183 (99.5) |  |
| With | 13 (0.6) | 1 (0.5) |  |
| **Anxiety disorder, unspecified, n (%)** |  |  | 1.10e-01 (0.74) |
| Without | 1508 (69.9) | 126 (68.5) |  |
| With | 648 (30.1) | 58 (31.5) |  |

**Notes:** Analysed using Chi-squared analysis with a significance threshold of <0.05.

**Abbreviations:** MDD< major depressive disorder.

**Supplemental Table 4. Correlations between scores total and domain level (n=2,156)**

|  | **Descriptor** | **Correlation** |
| --- | --- | --- |
| **PHQ-9** |  |  |
| 1 | Little interest or pleasure in doing things | 0.76 |
| 2 | Feeling down, depressed, or hopeless | 0.76 |
| 3 | Trouble falling or staying asleep or sleeping too much | 0.60 |
| 4 | Feeling tired or having little energy | 0.75 |
| 5 | Poor appetite or overeating | 0.67 |
| 6 | Feeling bad about yourself - or that you are a failure | 0.74 |
| 7 | Trouble concentrating | 0.71 |
| 8 | Moving or speaking so slowly that other people could have noticed. Or the opposite — being so fidgety or restless.  that you have been moving around a lot more than usual | 0.58 |
| 9 | Thoughts that you would be better off dead, or hurting yourself | 0.48 |
| **QIDS-C** |  |  |
| 1234 | Falling Asleep/Sleep During the Night/Waking Up Too Early/Sleeping Too Much | 0.47 |
| 5 | Feeling sad | 0.70 |
| 6789 | Decreased Appetite/Increased Appetite/Decreased Weight (Within the Last Two Weeks)/Increased Weight (Within the Last Two Weeks) | 0.34 |
| 10 | Concentration/decision making | 0.69 |
| 11 | View of myself | 0.69 |
| 12 | Thoughts of death or suicide | 0.47 |
| 13 | General interest | 0.76 |
| 14 | Energy level | 0.69 |
| 1516 | Feeling slowed down/Feeling restless | 0.47 |
| **VQIDS-C** |  |  |
| 5 | Feeling Sad | 0.69 |
| 11 | View of myself | 0.69 |
| 13 | General interest | 0.81 |
| 14 | Energy level | 0.77 |
| 15 | Feeling slowed down/Feeling restless | 0.41 |

**Abbreviations:** PHQ-9, Patient Health Questionnaire-9; QIDS-C, clinician rated Quick Inventory of Depressive Symptomatology; VQIDS-C, very brief 5-item Quick Inventory of Depressive Symptoms.
